# Supplementary material
Source: PubMed Central journal article supplement (PMC9191256)
Supplement: NIHMS1779846-supplement-PDF_file_of_supporting_info.pdf [file NIHMS1779846-supplement-PDF_file_of_supporting_info.pdf]

## SUPPORTING INFORMATION

### Incorporation of a Collagen-Binding Chondroitin Sulfate Molecule to a Collagen Type I and II Blend Hydrogel for Cartilage Tissue Engineering

#### AUTHORS

Claire E. Kilmer<sup>1</sup>, Tanaya Walimbe<sup>2</sup>, Alyssa Panitch<sup>2,3</sup>, Julie C. Liu<sup>1,3,\*</sup>

#### AFFILIATIONS

<sup>1</sup>Davidson School of Chemical Engineering, Purdue University, West Lafayette, IN, 47907, USA

<sup>2</sup>School of Biomedical Engineering, University of California Davis, Davis, CA, 95616, USA

<sup>3</sup>Weldon School of Biomedical Engineering, Purdue University, West Lafayette, IN, 47907, USA

\* Corresponding author.

E-mail address: [julieliu@purdue.edu](mailto:julieliu@purdue.edu)

Number of Supporting Information Pages: 7

Number of Supporting Information Figures: 5

Number of Supporting Information Tables: 1

Table S1. Primer sequences utilized for quantitative reverse transcription-polymerase chain reaction.

| Gene of Interest | Accession number  |         | 5' → 3' sequence             | Product length (bp) | Primer efficiency | Reference                   |
|------------------|-------------------|---------|------------------------------|---------------------|-------------------|-----------------------------|
| Collagen Type I  | NM<br>001195668.1 | Forward | ATGGATGAGGAAA<br>CTGGCAACT   | 114                 | 101.9%            | Liao, 2010 <sup>1</sup>     |
|                  |                   | Reverse | GCCATCGACAAGA<br>ACAGTGTAAGT |                     |                   |                             |
| Collagen Type II | NM<br>001195671.1 | Forward | GCCACCGTGCCCA<br>AGAAGAACT   | 160                 | 103.1%            | Yuan, 2016 <sup>2</sup>     |
|                  |                   | Reverse | ACAGCAGGCGCAG<br>GAAGGTCAT   |                     |                   |                             |
| Collagen Type X  | XM<br>002714724.3 | Forward | GCCAGGACCTCCA<br>GGACTATCA   | 103                 | 100.0%            | Zheng, 2009 <sup>3</sup>    |
|                  |                   | Reverse | CCCAATGTCTCCTT<br>TCGGTCCA   |                     |                   |                             |
| Aggrecan         | XM<br>008251723.2 | Forward | CCTACCAGGACAA<br>GGTCTCG     | 163                 | 98.1%             | Chen, 2016 <sup>4</sup>     |
|                  |                   | Reverse | ACACCTTTCACCA<br>CCACCTC     |                     |                   |                             |
| SOX9             | XM<br>008271763.2 | Forward | GGAAGCTCTGGAG<br>ACTGCTG     | 135                 | 96.8%             | Zhang, 2012 <sup>5</sup>    |
|                  |                   | Reverse | CGTTCTTCACCGA<br>CTTCCTC     |                     |                   |                             |
| GAPDH            | NM<br>001082253.1 | Forward | CGCCTGGAGAAAG<br>CTGCTA      | 104                 | 96.0%             | Morigele, 2013 <sup>6</sup> |
|                  |                   | Reverse | ACGACCTGGTCCT<br>CGGTGTA     |                     |                   |                             |

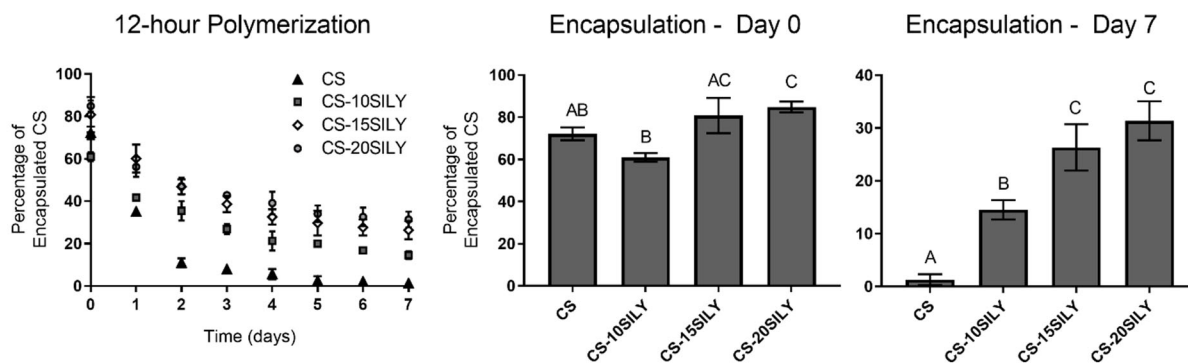

Figure S1. Percentage of encapsulated CS retained in the hydrogel over time after a 12-hour polymerization. CS Encapsulation after a wash or 7-day period are shown. Single factor analysis of variance (ANOVA) and Tukey post hoc tests were performed (n=4). Data that share the same letter do not have statistically significant differences ( $p > 0.05$ ) whereas data that do not share the same letter have statistically significantly differences ( $p < 0.05$ ). Data is represented as the mean  $\pm$  the standard deviation.

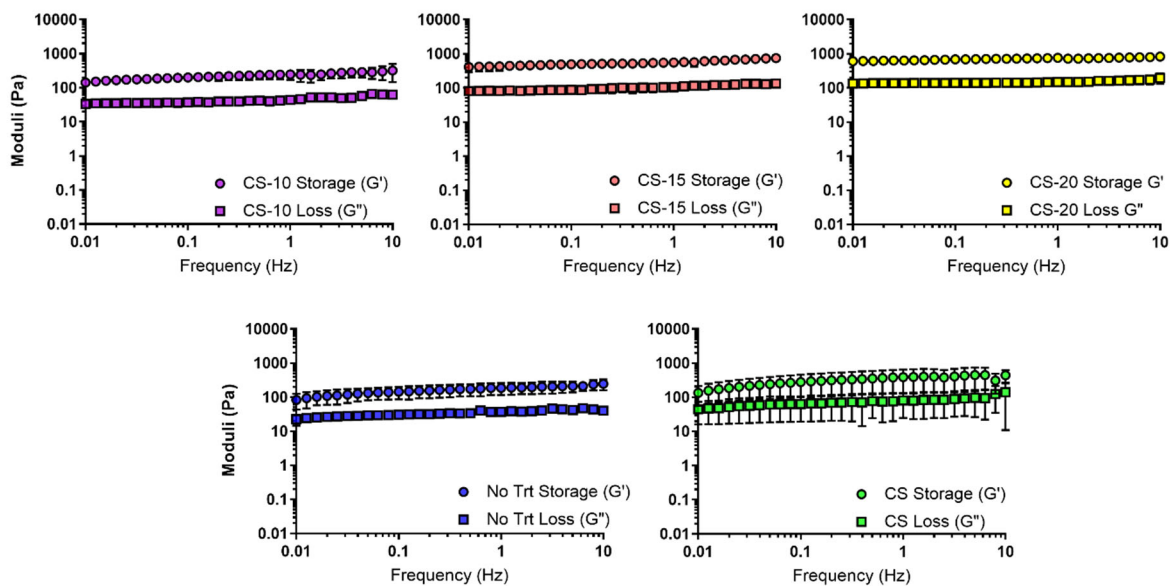

Figure S2. Storage and loss moduli of hydrogels with the addition of CS or CS-SILY molecules. Frequency sweeps from 0.01 to 10 Hz were performed. Data (n=3) is represented as the mean  $\pm$  the standard deviation.

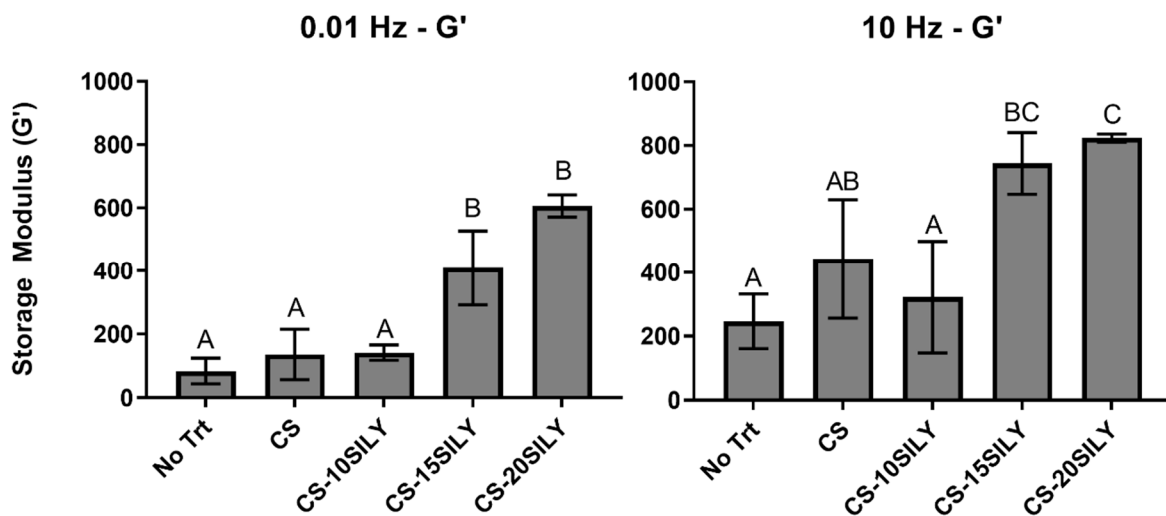

Figure S3. The storage modulus (G') of hydrogels with the addition of CS or CS-SILY molecules. Frequency sweeps from 0.01 to 10 Hz were performed. Single factor analysis of variance (ANOVA) and Tukey post hoc tests were performed (n=3) at 0.01 and 10 Hz. Data that share the same letter do not have statistically significant differences ( $p > 0.05$ ) whereas data that do not share the same letter have statistically significant differences ( $p < 0.05$ ). Data is represented as the mean  $\pm$  the standard deviation.

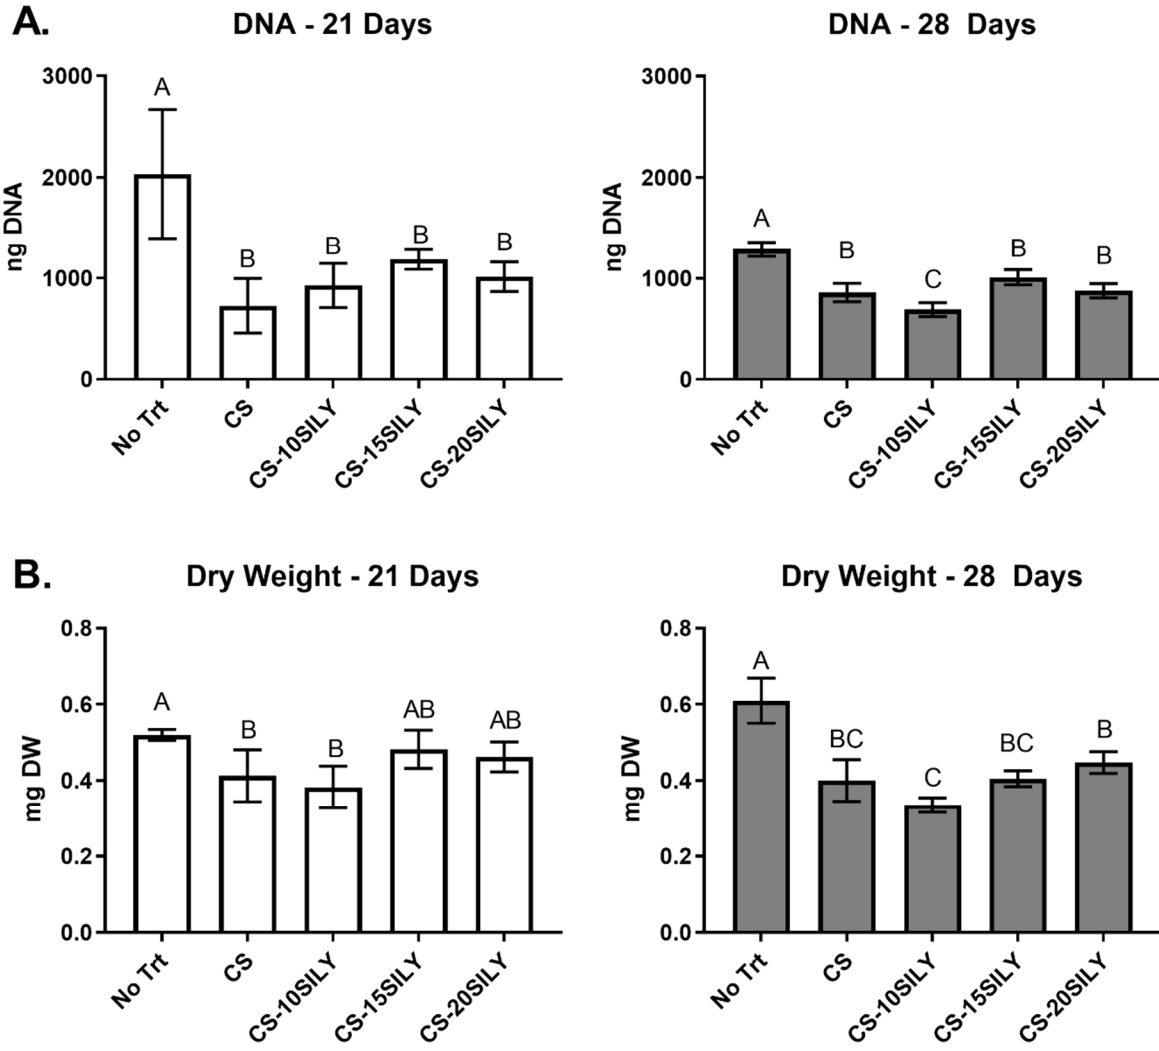

Figure S4. The mass of (A) DNA or (B) dry weight (DW) of the cell-hydrogel constructs with or with added CS or CS-SILY molecules after a 21-day or 28-day culture period. Values are expressed as mean  $\pm$  the standard deviation ( $n = 4$ ). An ANOVA and Tukey's post hoc test were performed. Data that share the same letter do not have statistically significant differences ( $p > 0.05$ ) whereas data that do not share the same letter have statistically significant differences ( $p < 0.05$ ).

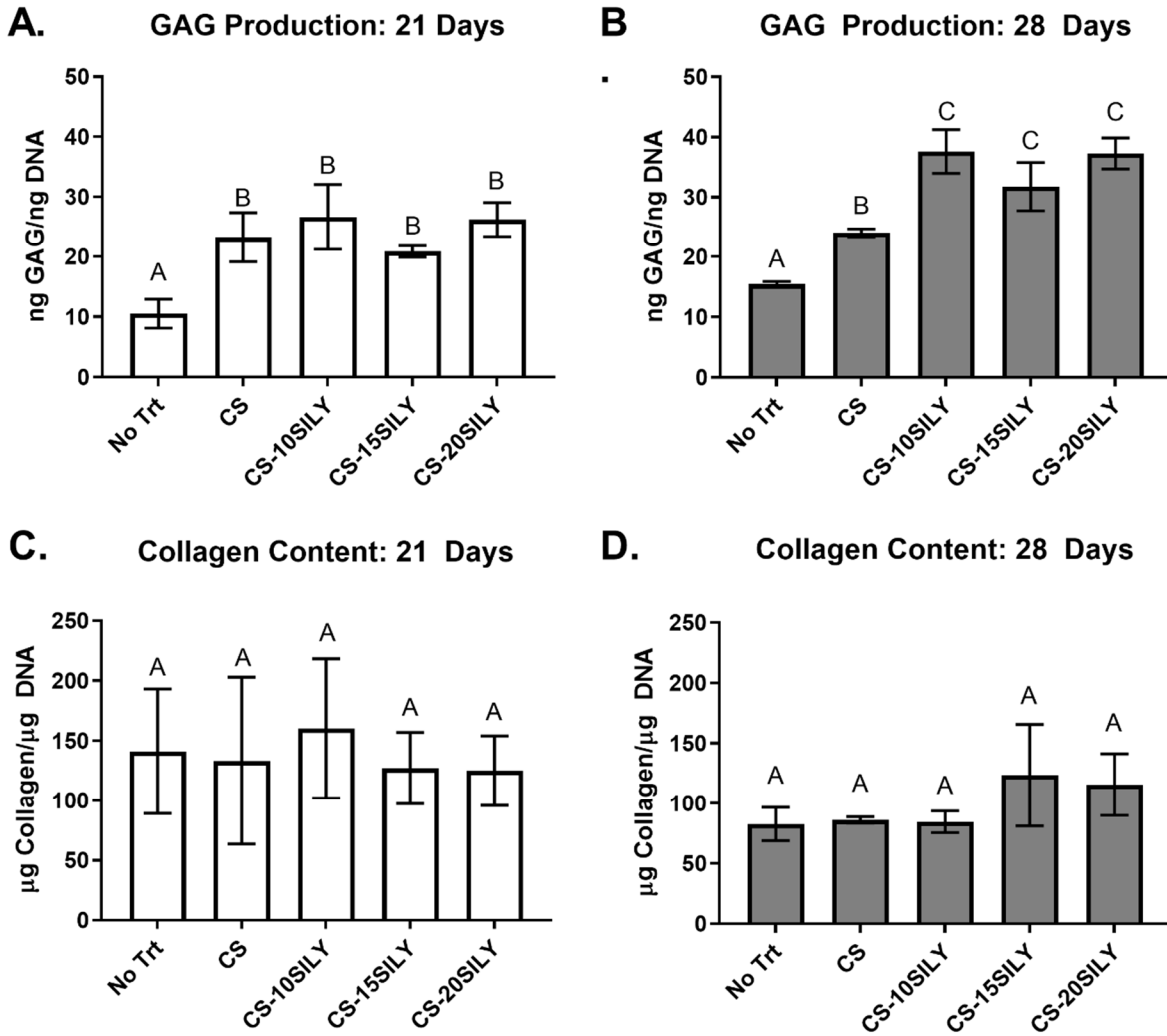

Figure S5. The addition of CS-SILY molecules increases normalized sulfated GAG production after 28 days in culture and has no change on normalized collagen content in scaffolds. GAG/DNA ratio of the cell-hydrogel constructs ( $n = 4$ ) with or with added CS or CS-SILY molecules after a (A) 21-day or (B) 28-day culture period. Total collagen/DNA ratio of the cell-hydrogel constructs ( $n = 3$ ) with or with added CS or CS-SILY molecules after a (C) 21-day or (D) 28-day culture period. Values are expressed as mean  $\pm$  standard deviation. ANOVA and Tukey's post hoc tests were performed. Data that share the same letter do not have statistically significant differences ( $p > 0.05$ ) whereas data that do not share the same letter have statistically significant differences ( $p < 0.05$ ).

## REFERENCES

- (1) Liao, J.; Guo, X.; Grande-Allen, K. J.; Kasper, F. K.; Mikos, A. G. Bioactive Polymer/Extracellular Matrix Scaffolds Fabricated with a Flow Perfusion Bioreactor for Cartilage Tissue Engineering. *Biomaterials* **2010**, *31* (34), 8911-8920. DOI: 10.1016/j.biomaterials.2010.07.110.
- (2) Yuan, L.; Li, B.; Yang, J.; Ni, Y.; Teng, Y.; Guo, L.; Fan, H.; Fan, Y.; Zhang, X. Effects of Composition and Mechanical Property of Injectable Collagen I/II Composite Hydrogels on Chondrocyte Behaviors. *Tissue Eng. Part A* **2016**, *22* (11-12), 899-906. DOI: 10.1089/ten.tea.2015.0513.
- (3) Zheng, L.; Sun, J.; Chen, X.; Wang, G.; Jiang, B.; Fan, H.; Zhang, X. In Vivo Cartilage Engineering with Collagen Hydrogel and Allogeneous Chondrocytes after Diffusion Chamber Implantation in Immunocompetent Host. *Tissue Eng. Part A* **2009**, *15* (8), 2145-2153. DOI: 10.1089/ten.tea.2008.0268.
- (4) Chen, C.-H.; Kuo, C.-Y.; Wang, Y.-J.; Chen, J.-P. Dual Function of Glucosamine in Gelatin/Hyaluronic Acid Cryogel to Modulate Scaffold Mechanical Properties and to Maintain Chondrogenic Phenotype for Cartilage Tissue Engineering. *Int. J. Mol. Sci.* **2016**, *17* (11), 1957. DOI: 10.3390/ijms17111957.
- (5) Zhang, L.; Yuan, T.; Guo, L.; Zhang, X. An In Vitro Study of Collagen Hydrogel to Induce the Chondrogenic Differentiation of Mesenchymal Stem Cells. *J. Biomed. Mater. Res. A* **2012**, *100A* (10), 2717-2725. DOI: 10.1002/jbm.a.34194.
- (6) Morigele, M.; Shao, Z.; Zhang, Z.; Kaige, M.; Zhang, Y.; Qiang, W.; Yang, S. TGF- $\beta$ 1 Induces a Nucleus Pulposus-Like Phenotype in Notch 1 Knockdown Rabbit Bone Marrow Mesenchymal Stem Cells. *Cell Biol. Int.* **2013**, *37* (8), 820-825. DOI: 10.1002/cbin.10109.
